# Supplementary material
Source: Springer Nature journal article supplement (https://www.springermedizin.de/resource/supplementary/12959_2006_53_MOESM4_ESM.pdf/9569440)

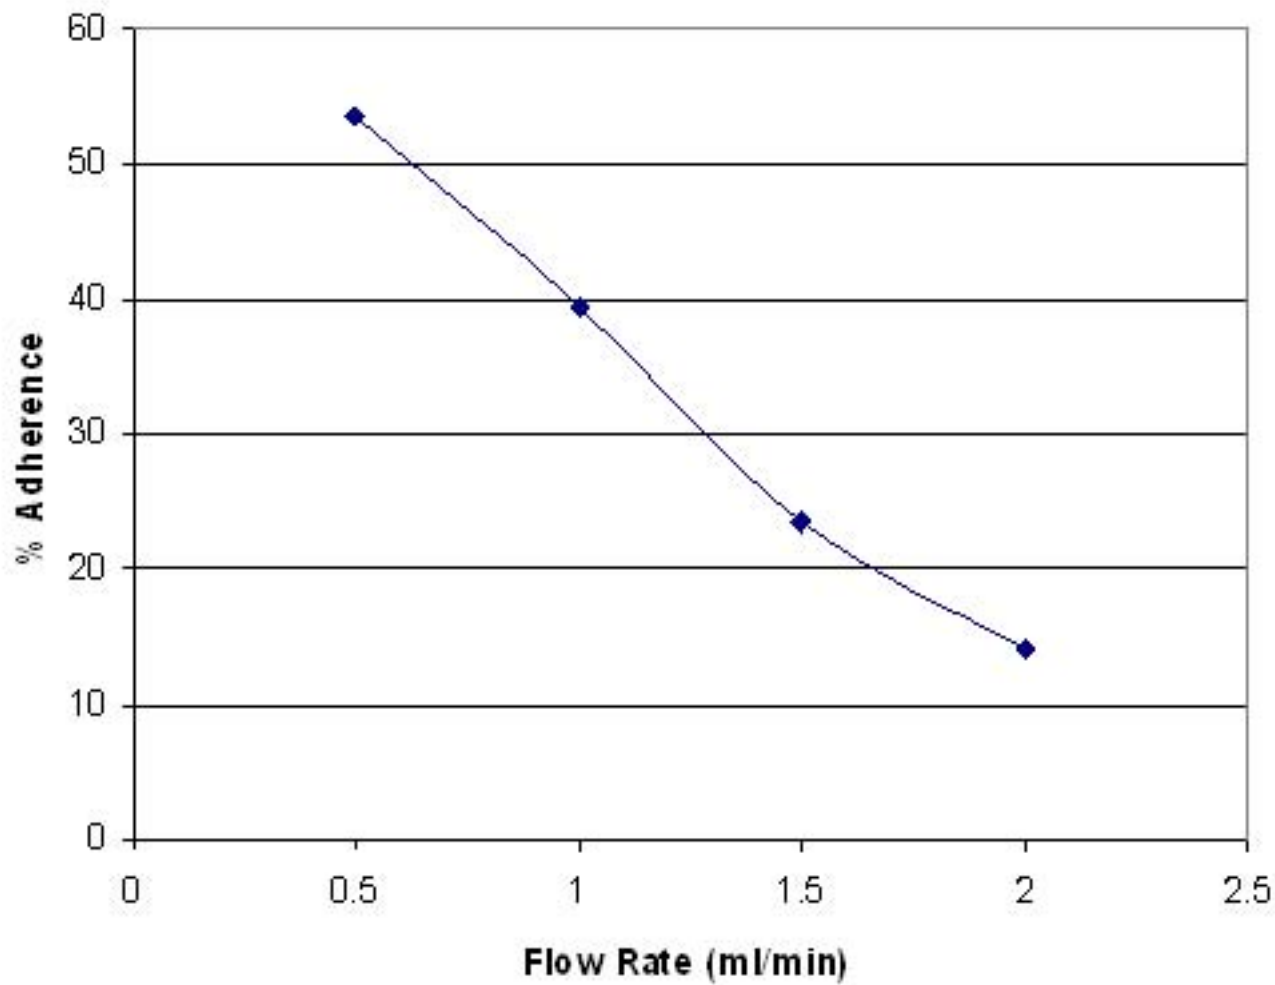

Supplement: MOESM4 [file 9569440]
